# Supplementary material for: Development of a colloidal gold strip assay for the detection of total homocysteine in serum samples
Source: Royal Society of Chemistry journal article supplement (doi:10.1039/d2an01105k), 2022-01-01
Supplement: d2an01105k1.pdf [file d2an01105k1.pdf]

*Supplementary Information*

**Development of a colloidal gold strip assay for the detection  
of total homocysteine in serum samples**

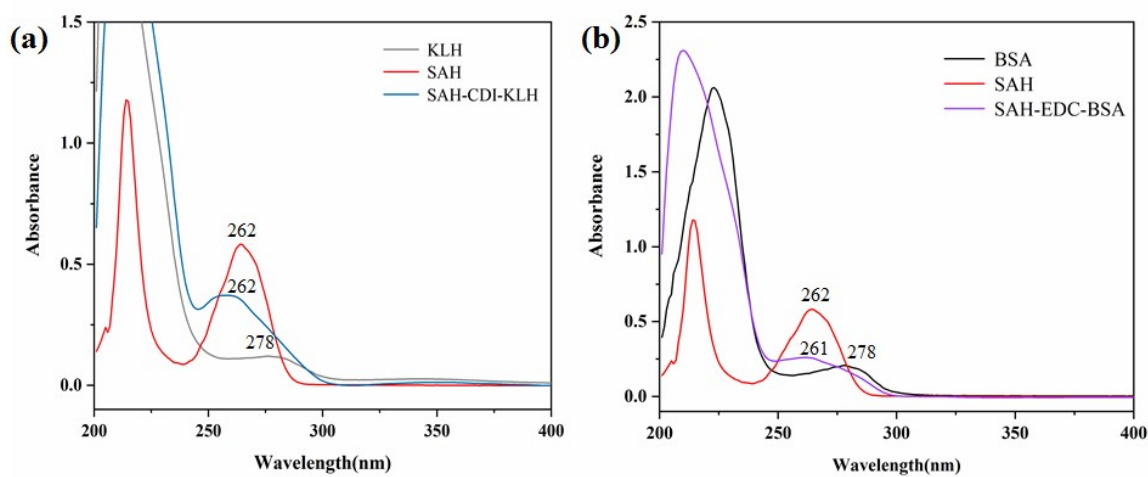

**Fig. S1.** Characterization of antigens by UV/Vis spectroscopy. (a) Immunogen SAH-CDI-KLH. (b) Coating antigen SAH-EDC-BSA.

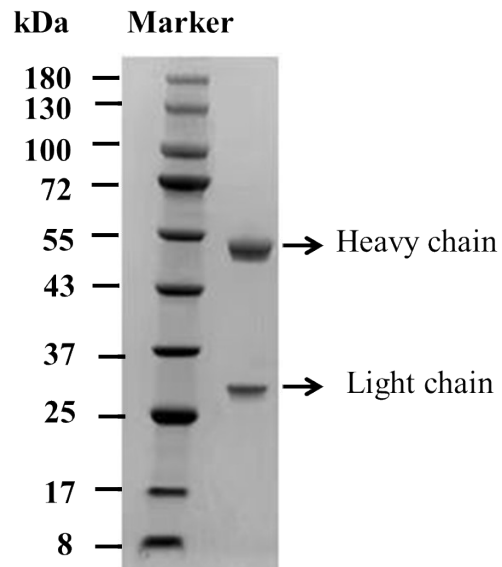

**Fig. S2.** The sodium dodecyl sulphate-polyacrylamide gel electrophoresis (SDS-PAGE) image of mAb 3B3 purified by protein G affinity chromatography.

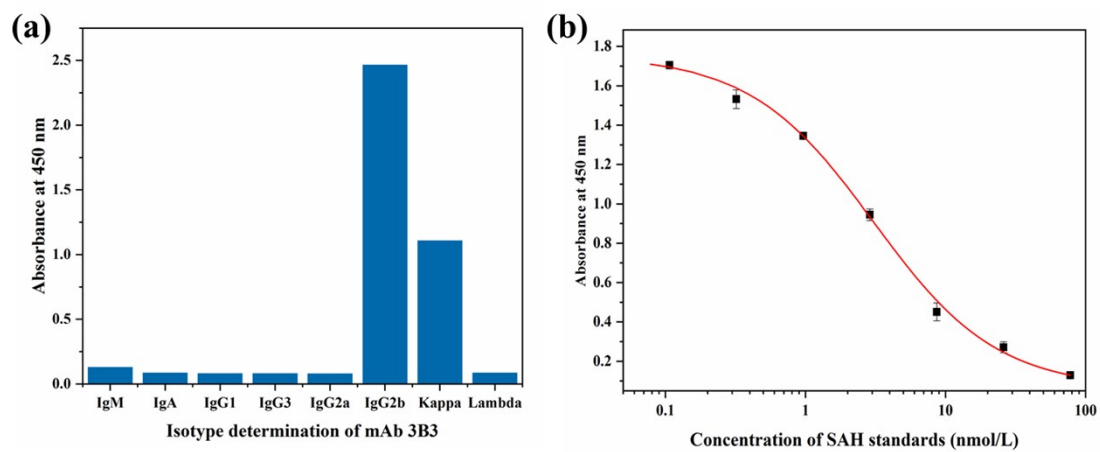

**Fig. S3.** Characterization of the mAb against SAH. (a) Isotype analysis of mAb 3B3. (b) Standard curve for SAH detection by ic-ELISA.

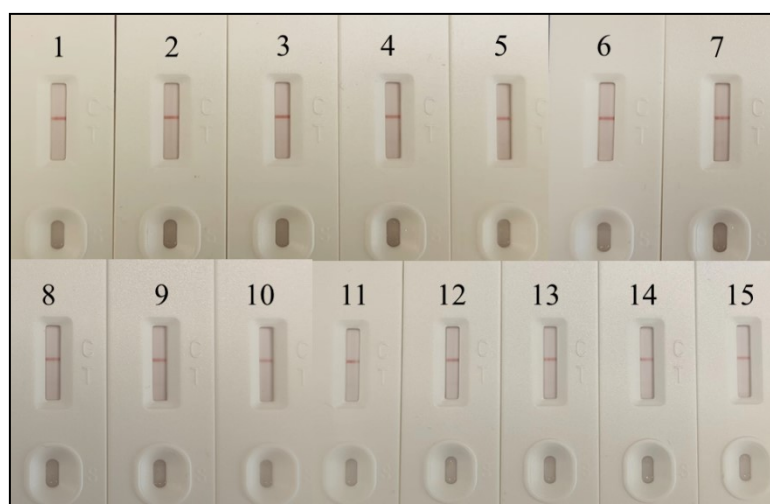

**Fig. S4.** Test of the 15 serum samples with LFIA strip after enzymatic hydrolysis. 1 to 15 were the post-reaction solution of 15 serum samples.

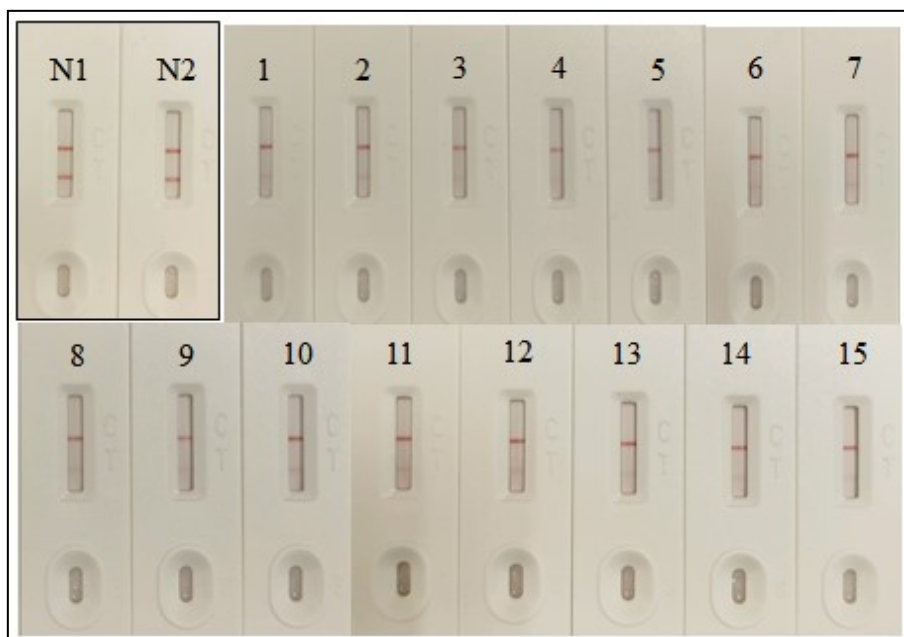

**Fig. S5.** tHcy detection of serum samples after enzymatic hydrolysis. N1 was the reaction solution of negative serum sample. N2 was PBS with 0 nM of SAH. 1 to 15 were the post-reaction solution of 15 serum samples with proper dilution.
